# Supplementary material for: Association between blood circulating vitamin D and colorectal cancer risk in Asian countries: a systematic review and dose-response meta-analysis
Source: PubMed Central journal article supplement — BMJ Open. 2019 Dec 23;9(12):e030513. doi: 10.1136/bmjopen-2019-030513 (PMC7008426; doi:10.1136/bmjopen-2019-030513), 2019-12-23

## Supplementary Material

**Table S1.** Literature search results from Medline, Embase, and Web of Science.

|   | Medline                                                                                                                                                                                                                                                                                                                                                                                                                                                                                                                                                                                                                                                                                                                                                                                                                                                | Results |
|---|--------------------------------------------------------------------------------------------------------------------------------------------------------------------------------------------------------------------------------------------------------------------------------------------------------------------------------------------------------------------------------------------------------------------------------------------------------------------------------------------------------------------------------------------------------------------------------------------------------------------------------------------------------------------------------------------------------------------------------------------------------------------------------------------------------------------------------------------------------|---------|
| 1 | exp colorectal neoplasms/                                                                                                                                                                                                                                                                                                                                                                                                                                                                                                                                                                                                                                                                                                                                                                                                                              | 187315  |
| 2 | (colorectal cancer* or colorectal or neoplasm* or colon cancer* or colon neoplasm* or bowel cancer* or colorectal adenoma* or colorectal adenocarcinoma* or colorectal polyp*).mp. [mp=title, abstract, original title, name of substance word, subject heading word, keyword heading word, protocol supplementary concept word, rare disease supplementary concept word, unique identifier, synonyms]                                                                                                                                                                                                                                                                                                                                                                                                                                                 | 2688871 |
| 3 | (25-OH-D or cholecalciferol or calcidiol or calcitriol or 25-hydroxyVitamin D or hydroxycholecalciferols or 25-hydroxyVitamin D3 or 1-alpha-hydroxylase or Vitamin D).mp. [mp=title, abstract, original title, name of substance word, subject heading word, keyword heading word, protocol supplementary concept word, rare disease supplementary concept word, unique identifier, synonyms]                                                                                                                                                                                                                                                                                                                                                                                                                                                          | 80293   |
| 4 | (Asia* or Afghanistan or Armenia or Azerbaijan or Bahrain or Bangladesh or Bhutan or Brunei or Cambodia or China or Cyprus or Georgia or India or Indonesia or Iran or Iraq or Israel or Japan or Jordan or Kazakhstan or Kuwait or Kyrgyzstan or Laos or Lebanon or Malaysia or Maldives or Mongolia or Myanmar or Burma or Nepal or North Korea or Oman or Pakistan or Palestine or Philippines or Qatar or Russia or Saudi Arabia or Singapore or South Korea or Sri Lanka or Syria or Taiwan or Tajikistan or Thailand or Timor-Leste or Turkey or Turkmenistan or United Arab Emirates or Uzbekistan or Vietnam or Yemen).mp. [mp=title, abstract, original title, name of substance word, subject heading word, keyword heading word, protocol supplementary concept word, rare disease supplementary concept word, unique identifier, synonyms] | 1074938 |
| 5 | 1 or 2                                                                                                                                                                                                                                                                                                                                                                                                                                                                                                                                                                                                                                                                                                                                                                                                                                                 | 2690742 |
| 6 | 3 and 4 and 5                                                                                                                                                                                                                                                                                                                                                                                                                                                                                                                                                                                                                                                                                                                                                                                                                                          | 258     |
| 7 | limit 6 to English language                                                                                                                                                                                                                                                                                                                                                                                                                                                                                                                                                                                                                                                                                                                                                                                                                            | 250     |

  

|   | Embase                                                                                                                                                                                                                                                                                                                                                                                                                                                                                    | Results |
|---|-------------------------------------------------------------------------------------------------------------------------------------------------------------------------------------------------------------------------------------------------------------------------------------------------------------------------------------------------------------------------------------------------------------------------------------------------------------------------------------------|---------|
| 1 | exp colorectal neoplasms/                                                                                                                                                                                                                                                                                                                                                                                                                                                                 | 26250   |
| 2 | (colorectal cancer* or colorectal or neoplasm* or colon cancer* or colon neoplasm* or bowel cancer* or colorectal adenoma* or colorectal adenocarcinoma* or colorectal polyp*).mp. [mp=title, abstract, original title, name of substance word, subject heading word, keyword heading word, protocol supplementary concept word, rare disease supplementary concept word, unique identifier, synonyms]                                                                                    | 1075151 |
| 3 | (25-OH-D or cholecalciferol or calcidiol or calcitriol or 25-hydroxyVitamin D or hydroxycholecalciferols or 25-hydroxyVitamin D3 or 1-alpha-hydroxylase or Vitamin D).mp. [mp=title, abstract, original title, name of substance word, subject heading word, keyword heading word, protocol supplementary concept word, rare disease supplementary concept word, unique identifier, synonyms]                                                                                             | 137427  |
| 4 | (Asia* or Afghanistan or Armenia or Azerbaijan or Bahrain or Bangladesh or Bhutan or Brunei or Cambodia or China or Cyprus or Georgia or India or Indonesia or Iran or Iraq or Israel or Japan or Jordan or Kazakhstan or Kuwait or Kyrgyzstan or Laos or Lebanon or Malaysia or Maldives or Mongolia or Myanmar or Burma or Nepal or North Korea or Oman or Pakistan or Palestine or Philippines or Qatar or Russia or Saudi Arabia or Singapore or South Korea or Sri Lanka or Syria or | 1562807 |

|   |                                                                                                                                                                                                                                                                                                                                                              |         |
|---|--------------------------------------------------------------------------------------------------------------------------------------------------------------------------------------------------------------------------------------------------------------------------------------------------------------------------------------------------------------|---------|
|   | Taiwan or Tajikistan or Thailand or Timor-Leste or Turkey or Turkmenistan or United Arab Emirates or Uzbekistan or Vietnam or Yemen).mp. [mp=title, abstract, original title, name of substance word, subject heading word, keyword heading word, protocol supplementary concept word, rare disease supplementary concept word, unique identifier, synonyms] |         |
| 5 | 1 or 2                                                                                                                                                                                                                                                                                                                                                       | 1075151 |
| 6 | 3 and 4 and 5                                                                                                                                                                                                                                                                                                                                                | 279     |
| 7 | limit 6 to English language                                                                                                                                                                                                                                                                                                                                  | 272     |

|   | Web of science                                                                                                                                                                                                                                                                                                                                                                                                                                                                                                                                                                                                                    | Results   |
|---|-----------------------------------------------------------------------------------------------------------------------------------------------------------------------------------------------------------------------------------------------------------------------------------------------------------------------------------------------------------------------------------------------------------------------------------------------------------------------------------------------------------------------------------------------------------------------------------------------------------------------------------|-----------|
| 1 | TS=(colorectal neoplasm or colorectal cancer* or colorectal or neoplasm* or colon cancer* or colon neoplasm* or bowel cancer* or colorectal adenoma* or colorectal adenocarcinoma* or colorectal polyp*)                                                                                                                                                                                                                                                                                                                                                                                                                          | 460,541   |
| 2 | TS=(25-OH-D or cholecalciferol or calcidiol or calcitriol or 25-hydroxyVitamin D or hydroxycholecalciferols or 25-hydroxyVitamin D3 or 1-alpha-hydroxylase or Vitamin D)                                                                                                                                                                                                                                                                                                                                                                                                                                                          | 99,758    |
| 3 | TS=(Asia* or Afghanistan or Armenia or Azerbaijan or Bahrain or Bangladesh or Bhutan or Brunei or Cambodia or China or Cyprus or Georgia or India or Indonesia or Iran or Iraq or Israel or Japan or Jordan or Kazakhstan or Kuwait or Kyrgyzstan or Laos or Lebanon or Malaysia or Maldives or Mongolia or Myanmar or Burma or Nepal or North Korea or Oman or Pakistan or Palestine or Philippines or Qatar or Russia or Saudi Arabia or Singapore or South Korea or Sri Lanka or Syria or Taiwan or Tajikistan or Thailand or Timor-Leste or Turkey or Turkmenistan or United Arab Emirates or Uzbekistan or Vietnam or Yemen) | 2,184,572 |
| 4 | #1 AND #2 AND #3                                                                                                                                                                                                                                                                                                                                                                                                                                                                                                                                                                                                                  | 106       |
| 5 | (#4) AND LANGUAGE: (English) AND DOCUMENT TYPES: (Article)                                                                                                                                                                                                                                                                                                                                                                                                                                                                                                                                                                        | 89        |

**Table S2.** List and details of the excluded studies from the meta-analysis

| Reason for exclusion                            | Author                  | Year | Study title                                                                                                                                                                      | Journal                                       |
|-------------------------------------------------|-------------------------|------|----------------------------------------------------------------------------------------------------------------------------------------------------------------------------------|-----------------------------------------------|
| Studied genotype of Vitamin D receptor(n=7)     | Wong HL, et al.         | 2003 | Vitamin D receptor start codon polymorphism and colorectal cancer risk: Effect modification by dietary calcium and fat in Singapore Chinese                                      | Carcinogenesis                                |
|                                                 | Li C, et al.            | 2009 | Vitamin D receptor gene polymorphisms and the risk of colorectal cancer in a Chinese population                                                                                  | Digestive Diseases and Sciences               |
|                                                 | Kang JW et al.          | 2015 | Role of vitamin D and local vitamin D receptor expression in colon carcinogenesis                                                                                                | Journal of Gastroenterology and Hepatology    |
|                                                 | Takehige N , et al.     | 2015 | Associations between vitamin D receptor (VDR) gene polymorphisms and colorectal cancer risk and effect modifications of dietary calcium and vitamin D in a Japanese population   | Asian Pac J Cancer Prev                       |
|                                                 | Aumpansub P , et al.    | 2016 | Strong association of single nucleotide polymorphisms of vitamin D receptor gene, BSMT1, and colorectal cancer in Asian population                                               | Gastroenterology                              |
|                                                 | Budhathoki S , et al.   | 2016 | Vitamin D receptor gene polymorphism and the risk of colorectal cancer: A nested case-control study                                                                              | PLoS ONE                                      |
|                                                 | Gong C , et al.         | 2017 | Dietary factors and polymorphisms in vitamin D metabolism genes: the risk and prognosis of colorectal cancer in northeast China                                                  | Scientific Reports                            |
| Not report the association with estimation(n=4) | Mizoue T, et al.        | 2005 | Dietary patterns and colorectal adenomas in Japanese men - The self-defense forces health study.                                                                                 | American Journal of Epidemiology              |
|                                                 | Atoum MF, et al.        | 2014 | Association between circulating vitamin D, the Taq1 vitamin D receptor gene polymorphism and colorectal cancer risk among Jordanians. Asian Pacific journal of cancer prevention | Asian Pacific Journal of Cancer Prevention    |
|                                                 | Kumagai Y, et al.       | 2014 | Dietary patterns and colorectal cancer risk in Japan: the Ohsaki Cohort Study.                                                                                                   | Cancer Causes & Control                       |
|                                                 | Hessami Arani S, et al. | 2017 | Rising rates of colorectal cancer among younger iranians: Is diet to blame?                                                                                                      | Current Oncology                              |
| Meeting proceeding (n=3)                        | Grant WB, et al.        | 2011 | Ecological study findings regarding vitamin D and cancer.                                                                                                                        | Anticancer Research                           |
|                                                 | Li K, et al.            | 2014 | The association between serum vitamin D concentrations and colorectal cancer.                                                                                                    | Clinical Chemistry and Laboratory Medicine    |
|                                                 | Ozer C, et al.          | 2015 | The relationship between serum 25-hydroxy vitamin D levels and insulin resistance in breast and colon cancer.                                                                    | Clinical Chemistry and Laboratory Medicine    |
| Letter to the reviewer (n=2)                    | Dunnigan MG, et al.     | 1990 | Serum 25-hydroxyvitamin D and colon cancer.                                                                                                                                      | Lancet                                        |
|                                                 | Qu B, et al.            | 2017 | Role of Circulating and Supplemental Calcium and Vitamin D in the Occurrence and Development of Colorectal Adenoma or Colorectal Cancer.                                         | J Clin Gastroenterol                          |
| Reports from same study sample (n=2)            | Byeon JS, et al.        | 2007 | Colorectal neoplasm in asymptomatic Asians: a prospective multinational multicenter colonoscopy survey.                                                                          | Gastrointestinal Endoscopy                    |
|                                                 | Shin A, et al.          | 2011 | Site-specific risk factors for colorectal cancer in a korean population.                                                                                                         | PLoS ONE                                      |
| Studied survivorship (n=2)                      | Wesa KM, et al.         | 2015 | Serum 25-hydroxy vitamin D and survival in advanced colorectal cancer: a retrospective analysis.                                                                                 | Nutr Cancer                                   |
|                                                 | Woo KW, et al.          | 2015 | Vitamin D deficiency in Hong Kong advanced cancer patients: Result of first 50 patients.                                                                                         | Annals of Oncology                            |
| Vitamin D intake (n=2)                          | Mizoue T, et al.        | 2008 | Calcium, dairy foods, vitamin D, and colorectal cancer risk: The Fukuoka colorectal cancer study.                                                                                | Cancer Epidemiology Biomarkers and Prevention |
|                                                 | Ishihara J, et al.      | 2008 | Dietary calcium, vitamin D, and the risk of colorectal cancer.                                                                                                                   | American Journal of Clinical Nutrition        |
| Western population (n=1)                        | Sy AM, et al.           | 2013 | Association between serum vitamin D levels and colonic carcinomatous polyps.                                                                                                     | Journal of Gastrointestinal Cancer            |
| Review (n=1)                                    | Grant WB, et al.        | 2009 | Ecological Studies Of Ultraviolet B, Vitamin D And Cancer Since 2000.                                                                                                            | Annals of Epidemiology                        |

**Table S3.** Newcastle-Ottawa Scale for assessing the quality of studies in the systematic review

| Author (Year)               | Country | Region        | Selection |    |    |    | Comparability |    | Exposure |    |    | Total Score |
|-----------------------------|---------|---------------|-----------|----|----|----|---------------|----|----------|----|----|-------------|
|                             |         |               | S1        | S2 | S3 | S4 | C1            | C2 | E1       | E2 | E3 |             |
| Budhathoki et al. (2018)[1] | Japan   | Eastern Asian | ★         | ★  | ★  | ★  | ★             | ★  | ★        | ★  | ★  | 8           |
| Choi et al. (2015)[2]       | Korea   | Eastern Asian | ★         |    |    |    | ★             | ★  | ★        | ★  |    | 5           |
| Hong et al. (2012)[3]       | Korea   | Eastern Asian | ★         | ★  | ★  | ★  | ★             | ★  | ★        | ★  |    | 8           |
| Otani et al. (2007)[4]      | Japan   | Eastern Asian | ★         | ★  | ★  | ★  | ★             | ★  | ★        | ★  | ★  | 9           |
| Takahashi et al. (2010)[5]  | Japan   | Eastern Asian | ★         | ★  | ★  | ★  |               | ★  | ★        | ★  | ★  | 8           |
| Yamaji et al. (2012)[6]     | Japan   | Eastern Asian | ★         | ★  | ★  | ★  | ★             | ★  | ★        | ★  | ★  | 9           |
| Ying et al. (2015)[7]       | China   | Eastern Asian | ★         |    |    | ★  | ★             | ★  | ★        | ★  |    | 7           |
| Yurekli et al.(2015)[8]     | Turkey  | Western Asian | ★         |    |    |    | ★             | ★  | ★        | ★  |    | 5           |

Guidelines for reviewSelection:

S1, Case definition adequacy: ★a) requires independent validation (>1 person/record/time/process to extract information or reference to primary record sources such as colonoscopy or medical/hospital records); b) record linkage or self-report with no reference to primary record; c) no description

S2, Representativeness of the cases: ★a) consecutive or representative series of cases; b) potential for selection biases or not stated

S3, Selection of controls: ★a) community controls; b) hospital controls, within same community as cases; c) no description

S4, Definition of controls: ★a) no history of colorectal cancer or adenoma; b) no description of the source

Comparability:

C1, ★ Study adjusted for confounder, such as age and sex (the most important factors);

C2, ★ Study adjusted for any additional confounders (1> additional factors, e.g., BMI, drinking or smoking)

Exposure:

E1, Ascertainment of exposure: ★a) secure record (e.g., medical records); ★b) structured interview were blind to case/control status; c) interview not blinded to case/control status; d) written self-report or medical record only; e) no description

E2, Same method of ascertainment for cases and controls: ★a) yes; b) no

E3, Non-response rate: ★a) the same rate for both groups; b) non-respondents described; c) rate different and no designation

**Figure S1.** Subgroup meta-analysis, including stratified by outcome (colorectal cancer or colorectal adenoma, **S1A**), sex (women, men or both, **S1B**), blood sample type (serum or plasma, **S1C**), range ( $\leq 15$  or  $>15$  ng/mL **S1D**), subregion (Eastern Asia or Western Asia, **S1E**).

**Figure S1A**

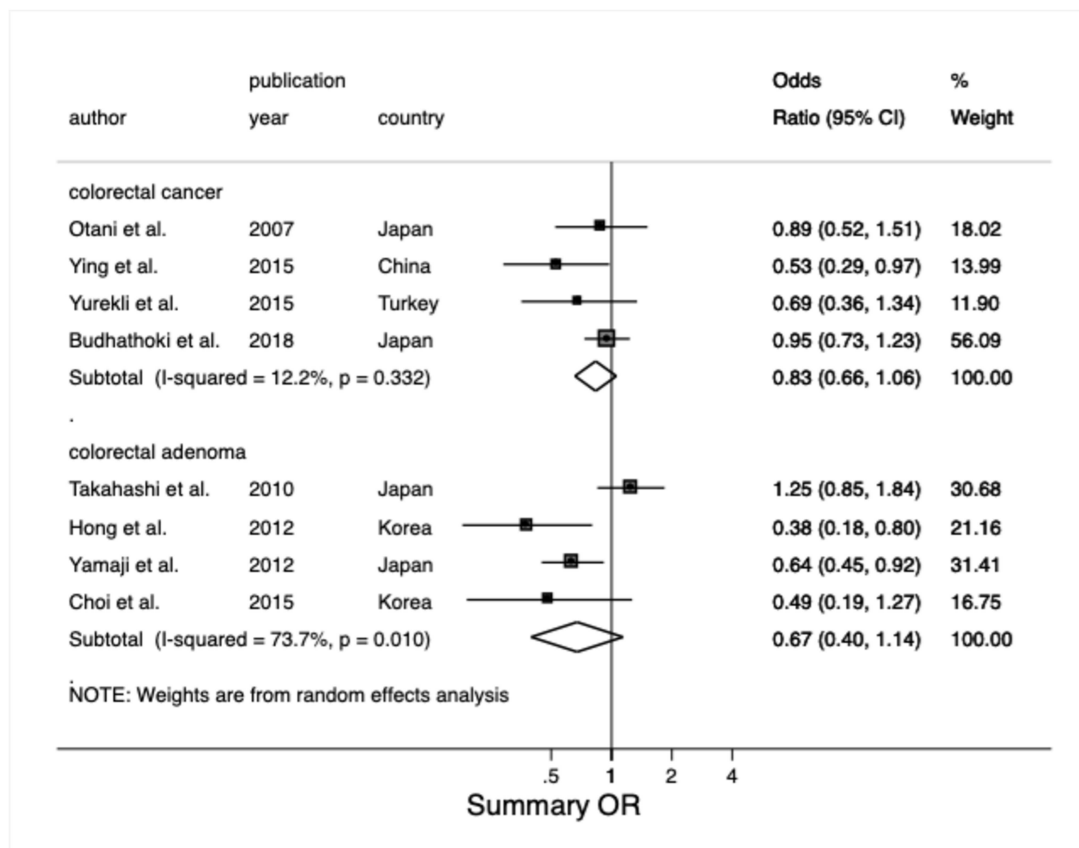

Figure S1B

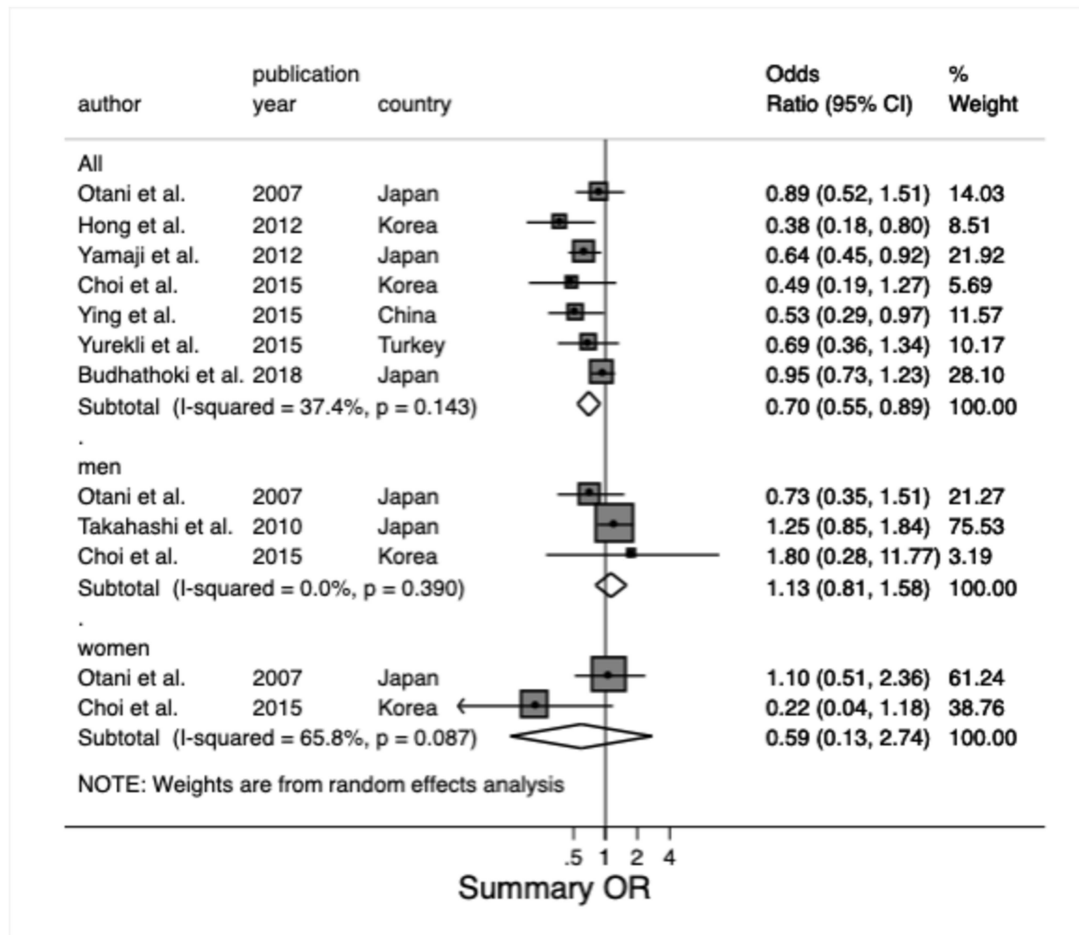

Figure S1C

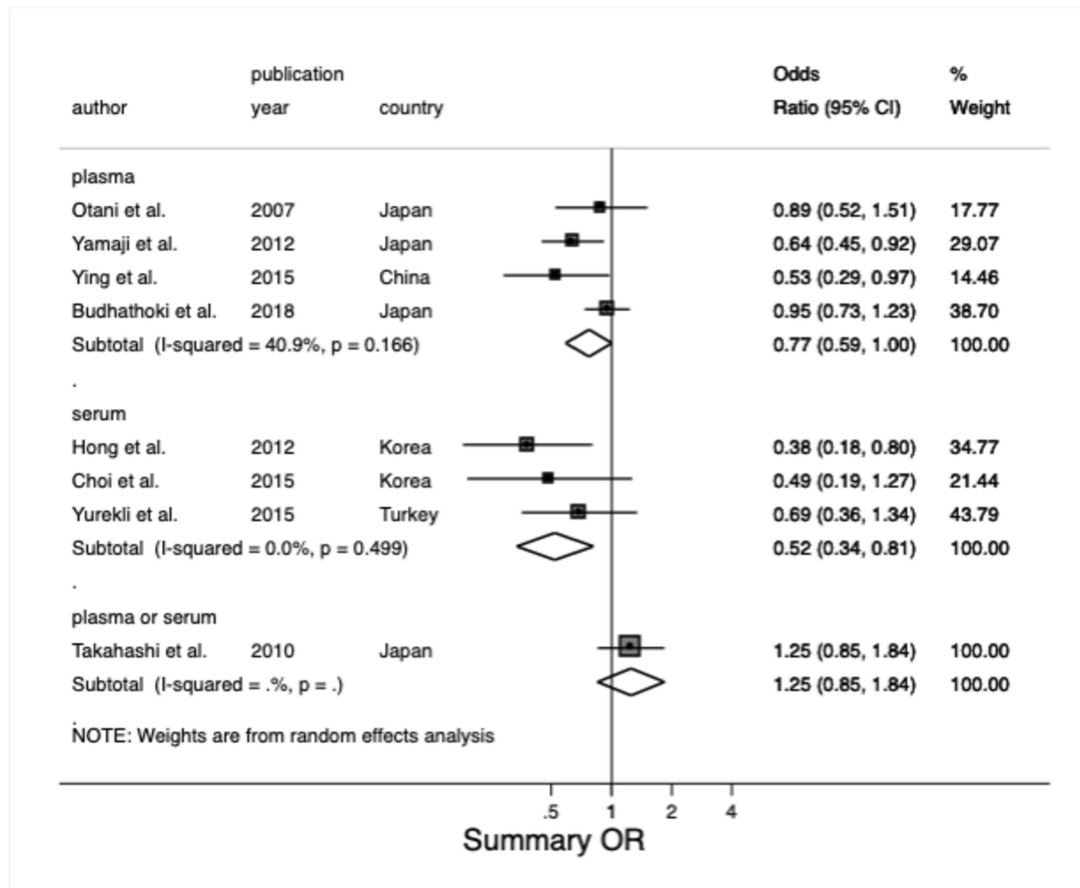

Figure S1D

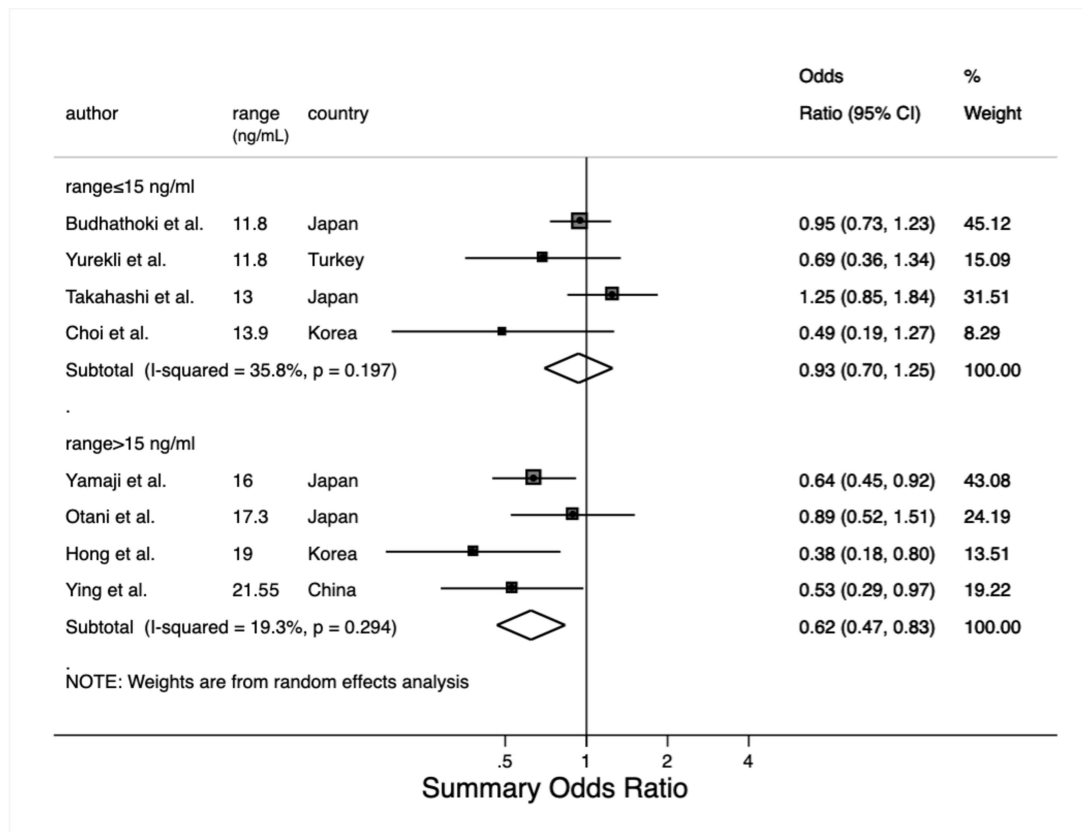



Figure S1E

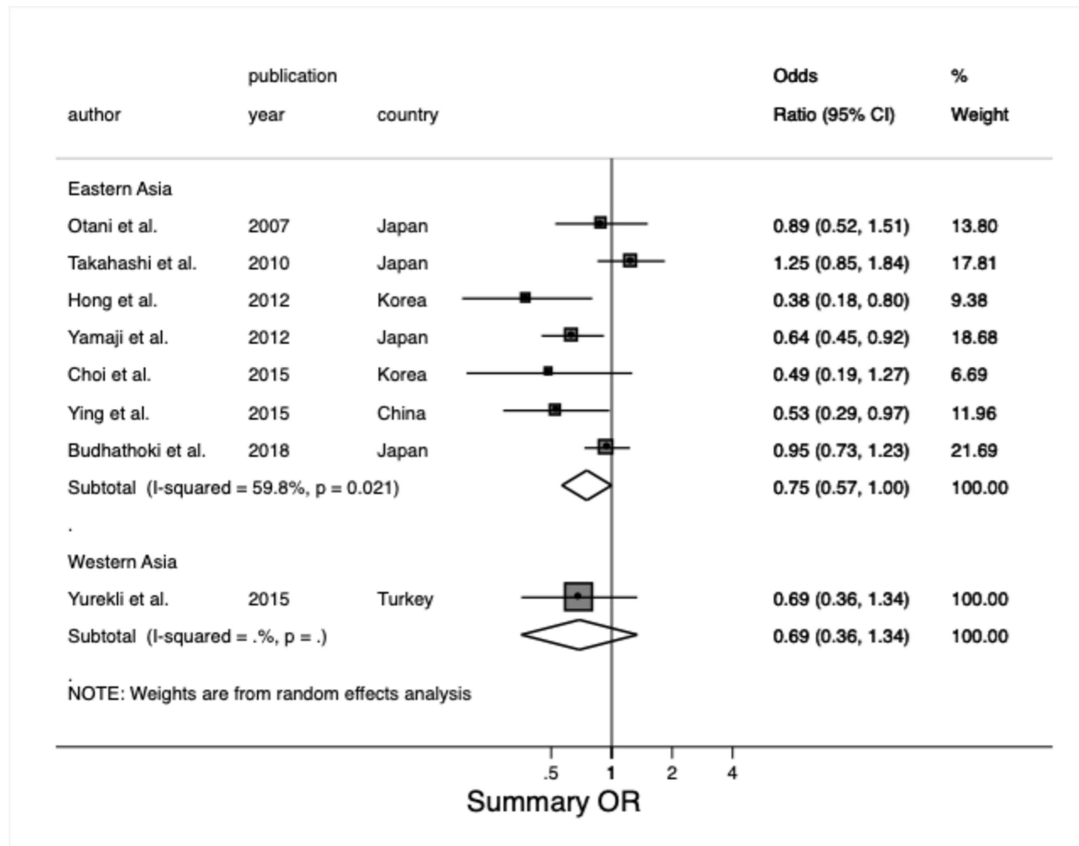

**Figure S2.** Funnel plot for all studies included in the meta-analysis and between blood circulating Vitamin D and the colorectal cancer risk in Asian countries

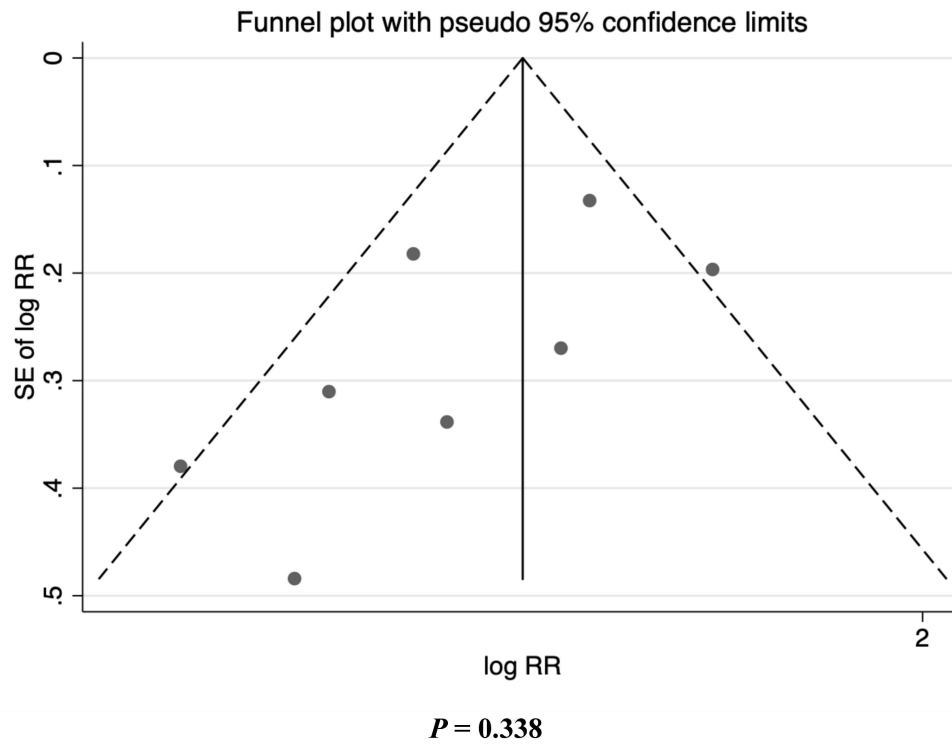

Supplement: bmjopen-2019-030513supp001.pdf [file bmjopen-2019-030513supp001.pdf]
